# Supplementary material for: Functional injectable hydrogel with spatiotemporal sequential release for recruitment of endogenous stem cells and in situ cartilage regeneration
Source: Royal Society of Chemistry journal article supplement (doi:10.1039/d3tb00105a), 2023-01-01
Supplement: d3tb00105a1.pdf [file d3tb00105a1.pdf]

## Supporting information

### **Functional injectable hydrogel with spatiotemporal sequential release for recruitment of endogenous stem cells and *in situ* cartilage regeneration**

Wenling Dai <sup>a, b</sup>, Qingli Liu <sup>a, b</sup>, Shikui Li <sup>a, b</sup>, Yongli Gao <sup>a, b</sup>, Cong Feng <sup>a, b</sup>, Likun Guo <sup>a, b, \*</sup>, Yumei Xiao <sup>a, b</sup>, Hai Lin <sup>a, b</sup>, Yujiang Fan <sup>a, b</sup>, Xingdong Zhang <sup>a, b</sup>

<sup>a</sup> National Engineering Research Center for Biomaterials, Sichuan University, 29 Wangjiang Road, Chengdu, Sichuan 610064, PR China

<sup>b</sup> School of Biomedical Engineering, Sichuan University, 29 Wangjiang Road, Chengdu, Sichuan 610064, PR China

\* Corresponding author. E-mail: likunguo@scu.edu.cn.

**Table S1** ICRS macroscopic score standard

| <b>Cartilage Repair Assessment ICRS</b>                                                       | <b>Score</b> |
|-----------------------------------------------------------------------------------------------|--------------|
| <b>I. Degree of defect repair</b>                                                             |              |
| In level with surrounding cartilage                                                           | 4            |
| 75% repair of defect depth                                                                    | 3            |
| 50% repair of defect depth                                                                    | 2            |
| 25% repair of defect depth                                                                    | 1            |
| 0% repair of defect depth                                                                     | 0            |
| <b>II. Integration to border zone</b>                                                         |              |
| Complete integration with surrounding cartilage                                               | 4            |
| Demarcating border < 1 mm                                                                     | 3            |
| Three-quarters of graft integrated, one-quarter with a notable border > 1mm width             | 2            |
| One-half of graft integrated with surrounding cartilage, one-half with a notable border > 1mm | 1            |
| From no contact to one-quarter of graft integrated with surrounding cartilage                 | 0            |
| <b>III. Macroscopic appearance</b>                                                            |              |
| Intact smooth surface                                                                         | 4            |
| Fibrillated surface                                                                           | 3            |
| Small, scattered fissures or cracks                                                           | 2            |
| Several, small or few but large fissures                                                      | 1            |
| Total degeneration of grafted area                                                            | 0            |
| <b>IV. Overall repair assessment</b>                                                          |              |
| Grade I: normal                                                                               | 12           |
| Grade II: nearly normal                                                                       | 11-8         |
| Grade III: abnormal                                                                           | 7-4          |
| Grade IV: severely abnormal                                                                   | 3-1          |

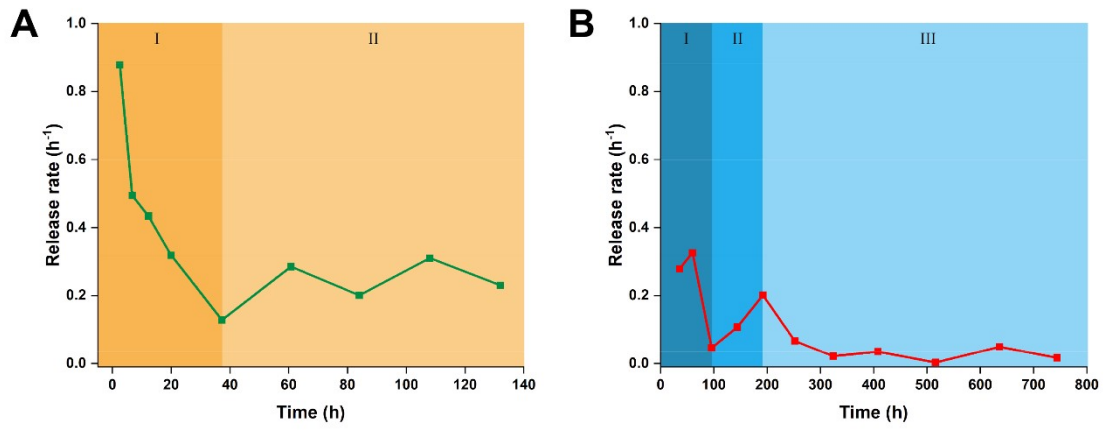

**Fig. S1** The release rate profile of Apt19S (A) and KGN (B).

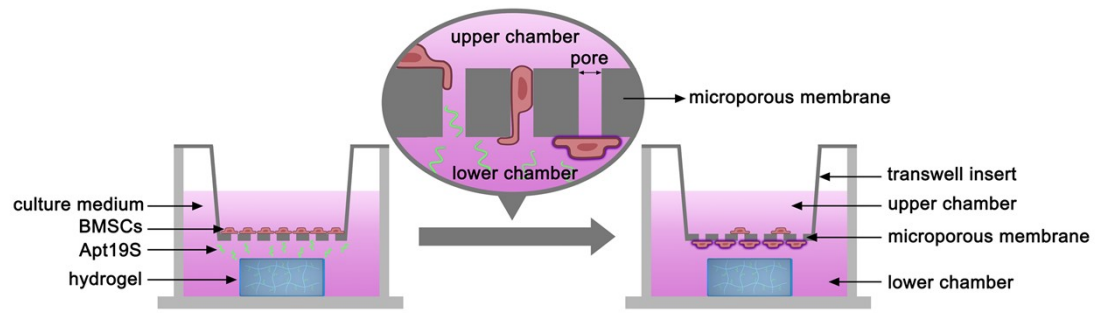

**Fig. S2** The schematic of transwell system to detect BMSCs transmembrane migration affected by the release of Apt19S from Col-Apt hydrogel.
